# Supplementary material for: Controlling the motor activity of a transcription-repair coupling factor: autoinhibition and the role of RNA polymerase
Source: PubMed Central journal article supplement — Nucleic Acids Res. 2007 Feb 28;35(6):1802–11. doi: 10.1093/nar/gkm019 (PMC1874598; doi:10.1093/nar/gkm019), 2007-02-28
Supplement: nar_gkm019_1.pdf [file nar_gkm019_1.pdf]

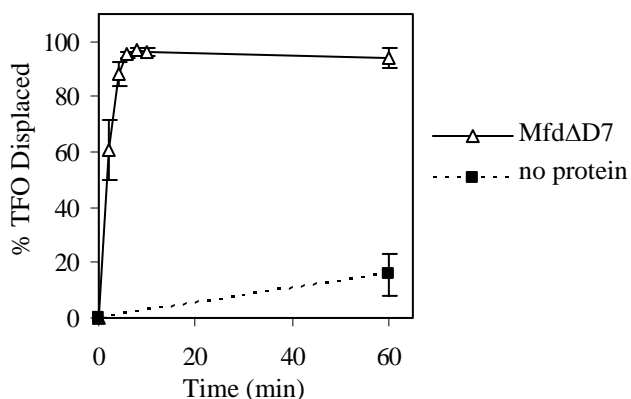

**Smith *et al.* Supplementary Figure 1. TFO displacement by MfdΔD7 on supercoiled circular template.**

5 nM supercoiled pSRTB1 DNA containing a triplex was incubated with 250 nM (open triangles) or in the absence of MfdΔD7 (filled squares). Reactions were initiated by the addition of 2 mM ATP. Aliquots were removed and the reaction quenched at the indicated time points. The graph shows the percentage of TFO displaced at each time point, normalised for the amount of triplex present at  $t=0$ . Data points are the average of at least three independent experiments, with standard deviation.

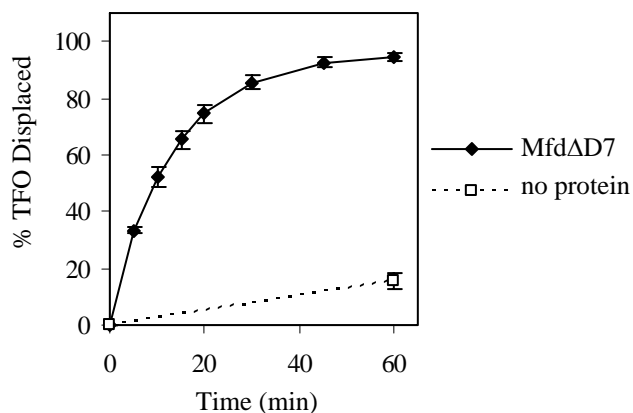

**Smith et al. Supplementary figure 2. TFO displacement by MfdDD7 under the conditions used for the RNAP displacement assays shown in Figure 4.**

5 nM linear pSRTB1 DNA (linearised with AlwNI) containing a triplex was incubated with 250 nM MfdDD7 (filled diamonds) or in the absence of MfdDD7 (white squares). Reactions were carried out in repair buffer containing 10 mg/ml heparin and were initiated by the addition of 2 mM ATP. Aliquots were removed at the indicated time points, quenched and analysed by gel electrophoresis. The graphs shows the percentage of TFO displaced at each time point, normalised for the amount of triplex present at t=0. Data points are the average of two independent experiments, shown with data range.
